# Supplementary material for: Large scale synthesis of ultralong aligned buckled multiwalled carbon nanotubes by one-step pyrolysis
Source: Royal Society of Chemistry journal article supplement (doi:10.1039/c2ce26246k), 2012-01-01
Supplement: c2ce26246k.pdf [file c2ce26246k.pdf]

Electronic supplementary Information (ESI) for “Large scale synthesis of ultralong aligned buckled multiwalled carbon nanotubes by one-step pyrolysis “

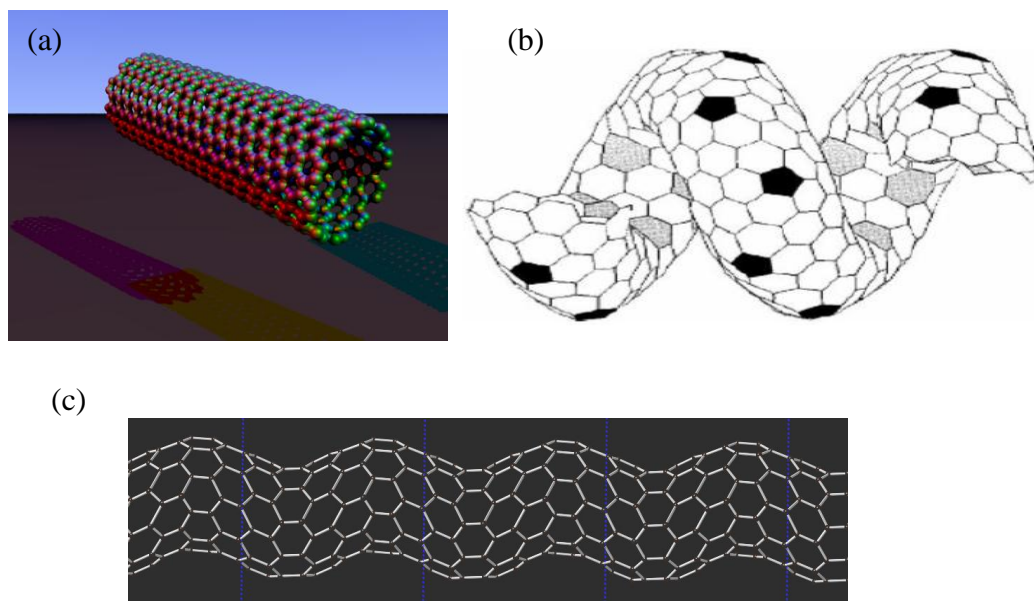

Fig. S1 Schematic of a (a) straight, (b) coiled, and (c) buckled single walled carbon nanotubes.

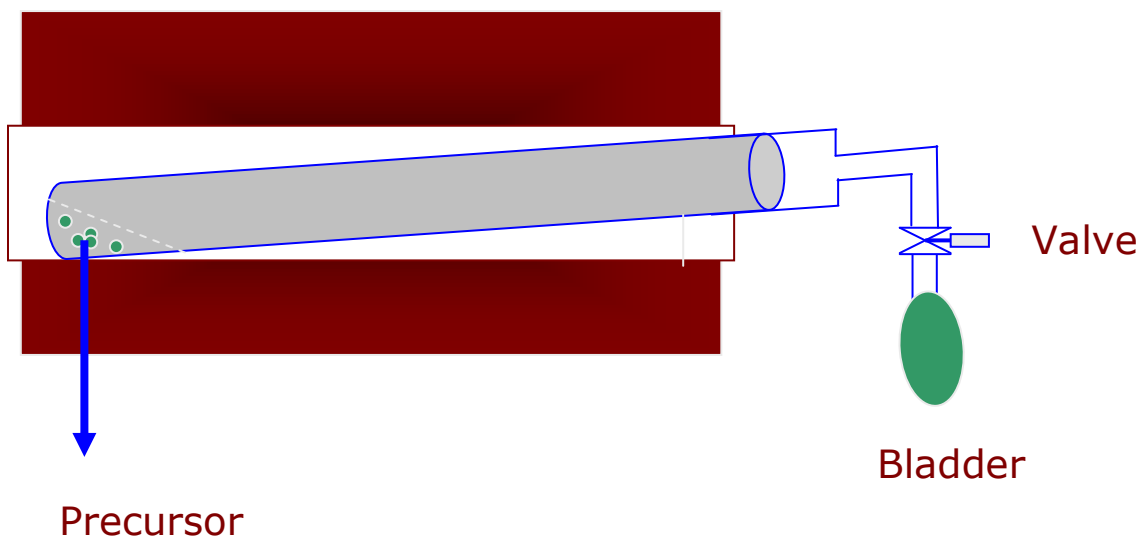

Fig. S2. Schematic of the experimental set up.

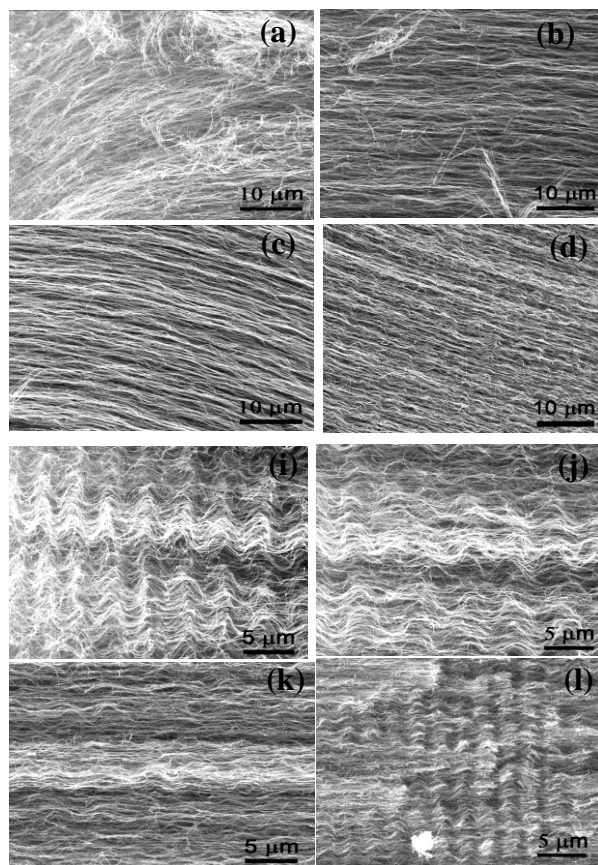

Fig. S3. BMWCNTs prepared with different concentrations of precursors.
